# Supplementary material for: SiO2-Ag Composite as a Highly Virucidal Material: A Roadmap that Rapidly Eliminates SARS-CoV-2
Source: PubMed Central journal article supplement (PMC8001031; doi:10.3390/nano11030638), 2021-03-04
Supplement: nanomaterials-11-00638-s001.pdf [file nanomaterials-11-00638-s001.pdf]

*Supplementary Material*

# SiO<sub>2</sub>-Ag Composite as a Highly Virucidal Material: A Roadmap That Rapidly Eliminates SARS-CoV-2

Marcelo Assis<sup>1,2</sup>, Luiz Gustavo P. Simoes<sup>3</sup>, Guilherme C. Tremiliosi<sup>3</sup>, Dyovani Coelho<sup>1</sup>, Daniel T. Minozzi<sup>3</sup>, Renato I. Santos<sup>3</sup>, Daiane C. B. Vilela<sup>3</sup>, Jeziel Rodrigues do Santos<sup>1</sup>, Lara Kelly Ribeiro<sup>1</sup>, Ieda Lucia Viana Rosa<sup>1</sup>, Lucia Helena Mascaro<sup>1</sup>, Juan Andrés<sup>2,\*</sup> and Elson Longo<sup>1</sup>

<sup>1</sup> CDME, LIEC, Federal University of São Carlos - (UFSCar), 13565-905 São Carlos, SP, Brazil. marcelostassis@gmail.com (M.A.); dyovani@gmail.com (D.C.); prof.jeziel@gmail.com (J.R.S.); larakribeiro@gmail.com (L.K.R.); ilvroza@ufscar.br (I.L.V.R.); lmascaro@ufscar.br (L.H.M.); elson.liec@gmail.com (E. L.)

<sup>2</sup> Department of Physical and Analytical Chemistry, University Jaume I (UJI), Castellon 12071, Spain.

<sup>3</sup> Nanox Tecnologia S/A, 13562-400 São Carlos, SP, Brazil. gustavo@nanox.com.br (L.G.P.S.); guilherme@nanox.com.br (G.C.T.); daniel@nanox.com.br (D.T.M); renato.santos@nanox.com.br (R.T.S); microbiologia@nanox.com.br (D.C.B.V)

\* Correspondence: andres@qfa.uji.es

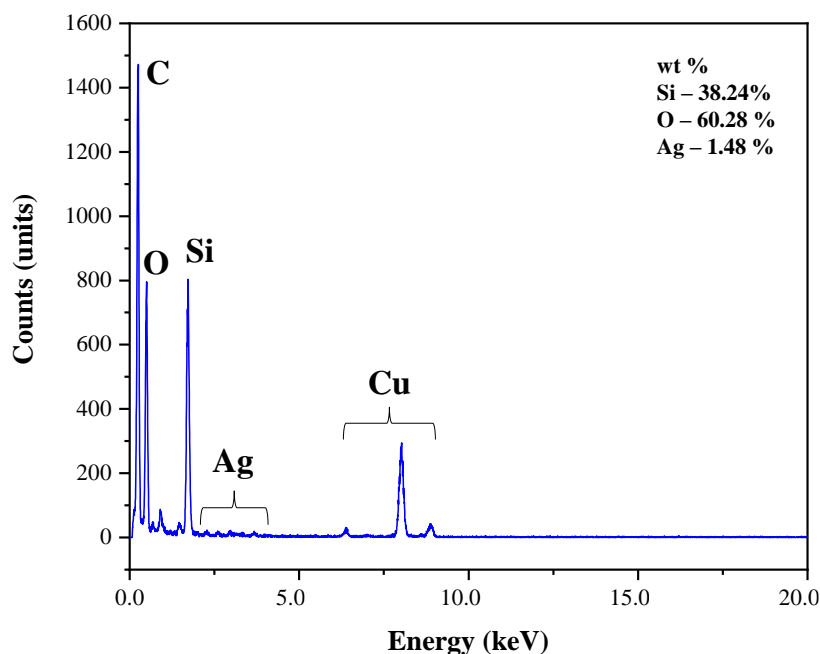

Figure S1. Chemical composition from EDX analysis of the SiO<sub>2</sub>-Ag.

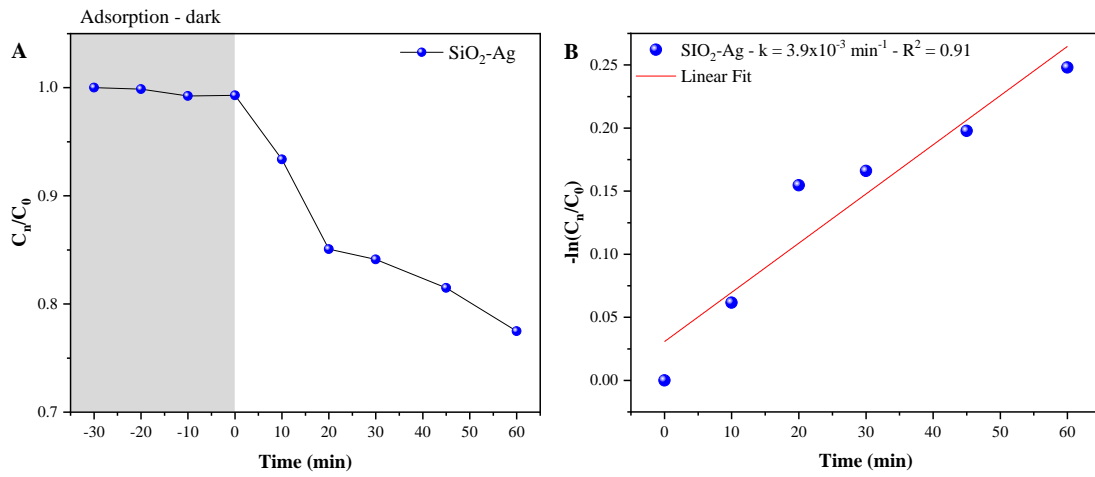

**Figure S2.** (A) Relative concentration of RhB dye ( $C_n/C_0$ ). (B) Reaction kinetics of the RhB degradation  $-\ln(C_n/C_0)$  versus time (min) for SiO<sub>2</sub>-Ag composite.

Silica surfaces have been extensively studied through theoretical calculations with both a cluster and periodic approach. The choice of the modeling method is still a matter of debate, since studies show that cluster calculations that do not take into account the long-range interaction approximations imposed by the extremities are not adequate to describe the silanol groups (Si-OH). For our model we have 1 ring with 4 silicon, 5 silicon and 7 silicon. Our model is composed by three polygons: square, pentagon and heptagon, and later the atoms with the same position were removed. (Figure S3) So this model has 12 Si atoms and 22 oxygen atoms, that is, the surface has two oxygen vacancies. The corresponding optimized SiO<sub>2</sub> model was presented in Figure S4 and Table S1. On the other hand, it is well known that the functional hybrid B3LYP is appropriate for studies of interactions with small molecules, such as H<sub>2</sub>O. [1,2]

**Figure S3** Schematic representation of the different rings used for modeling SiO<sub>2</sub>. Silicon (yellow) and Oxygen (red).

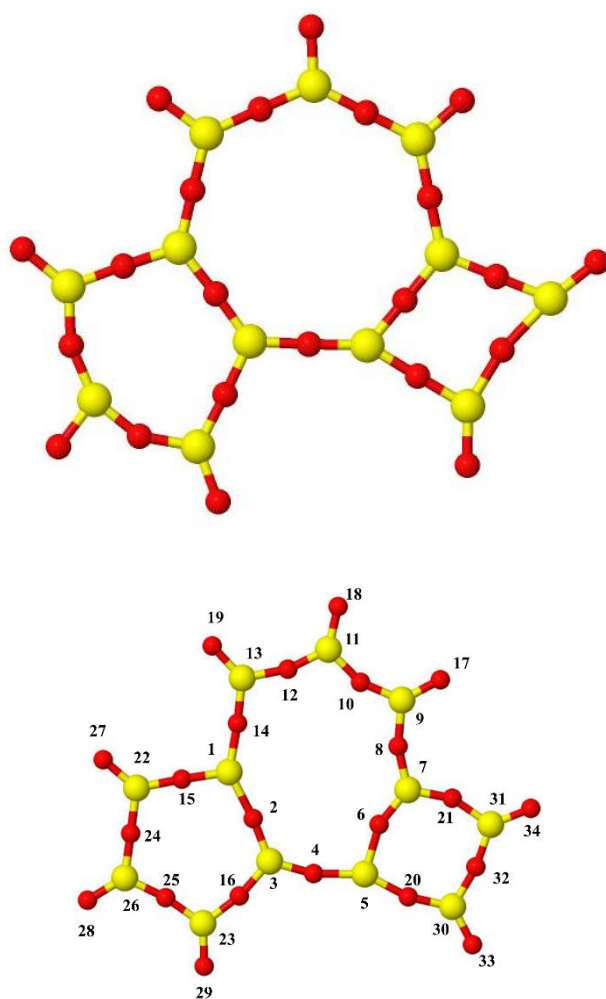

**Figure S4.** The optimized SiO<sub>2</sub> model used in the calculations.

**Table S1** Bond angles and lengths of the structure used.

| connectivity                    | bond length (Å) | connectivity                                     | bond angle (°) |
|---------------------------------|-----------------|--------------------------------------------------|----------------|
| Si <sub>1</sub> -O <sub>2</sub> | 1.86            | O <sub>14</sub> -Si <sub>1</sub> -O <sub>2</sub> | 143.2          |

|                                   |      |                                                    |       |
|-----------------------------------|------|----------------------------------------------------|-------|
| O <sub>2</sub> -Si <sub>3</sub>   | 1.65 | O <sub>2</sub> -Si <sub>3</sub> -O <sub>4</sub>    | 126.5 |
| Si <sub>3</sub> -O <sub>4</sub>   | 1.61 | O <sub>4</sub> -Si <sub>5</sub> -O <sub>6</sub>    | 105.1 |
| O <sub>4</sub> -Si <sub>5</sub>   | 1.81 | O <sub>6</sub> -Si <sub>7</sub> -O <sub>8</sub>    | 127.2 |
| Si <sub>5</sub> -O <sub>6</sub>   | 1.85 | O <sub>8</sub> -Si <sub>9</sub> -O <sub>10</sub>   | 109.1 |
| O <sub>6</sub> -Si <sub>7</sub>   | 1.60 | O <sub>10</sub> -Si <sub>11</sub> -O <sub>12</sub> | 108.1 |
| Si <sub>7</sub> -O <sub>8</sub>   | 1.59 | O <sub>12</sub> -Si <sub>13</sub> -O <sub>14</sub> | 106.8 |
| O <sub>8</sub> -Si <sub>9</sub>   | 1.64 | O <sub>15</sub> -Si <sub>1</sub> -O <sub>2</sub>   | 108.4 |
| Si <sub>9</sub> -O <sub>10</sub>  | 1.60 | O <sub>16</sub> -Si <sub>3</sub> -O <sub>2</sub>   | 117.7 |
| O <sub>10</sub> -Si <sub>11</sub> | 1.63 | O <sub>25</sub> -Si <sub>23</sub> -O <sub>16</sub> | 107.8 |
| Si <sub>11</sub> -O <sub>12</sub> | 1.60 | O <sub>24</sub> -Si <sub>26</sub> -O <sub>25</sub> | 108.2 |
| O <sub>12</sub> -Si <sub>13</sub> | 1.64 | O <sub>24</sub> -Si <sub>22</sub> -O <sub>15</sub> | 108.9 |
| Si <sub>13</sub> -O <sub>14</sub> | 1.61 | O <sub>20</sub> -Si <sub>6</sub> -O <sub>5</sub>   | 101.6 |
| O <sub>14</sub> -Si <sub>1</sub>  | 1.74 | O <sub>21</sub> -Si <sub>7</sub> -O <sub>6</sub>   | 119   |
| O <sub>15</sub> -Si <sub>1</sub>  | 1.70 | O <sub>32</sub> -Si <sub>30</sub> -O <sub>20</sub> | 107.3 |
| O <sub>16</sub> -Si <sub>3</sub>  | 1.63 | O <sub>32</sub> -Si <sub>31</sub> -O <sub>21</sub> | 105.6 |
| O <sub>17</sub> -Si <sub>9</sub>  | 1.54 | O <sub>17</sub> -Si <sub>9</sub> -O <sub>8</sub>   | 122.2 |
| O <sub>18</sub> -Si <sub>11</sub> | 1.54 | O <sub>18</sub> -Si <sub>11</sub> -O <sub>10</sub> | 123.1 |
| O <sub>19</sub> -Si <sub>13</sub> | 1.54 | O <sub>19</sub> -Si <sub>13</sub> -O <sub>12</sub> | 122.3 |
| O <sub>20</sub> -Si <sub>5</sub>  | 1.74 | O <sub>27</sub> -Si <sub>22</sub> -O <sub>15</sub> | 128.5 |
| O <sub>21</sub> -Si <sub>7</sub>  | 1.60 | O <sub>28</sub> -Si <sub>26</sub> -O <sub>24</sub> | 128.8 |
| Si <sub>22</sub> -O <sub>15</sub> | 1.62 | O <sub>29</sub> -Si <sub>23</sub> -O <sub>25</sub> | 126.5 |
| Si <sub>23</sub> -O <sub>16</sub> | 1.62 | O <sub>33</sub> -Si <sub>30</sub> -O <sub>20</sub> | 130.3 |
| O <sub>24</sub> -Si <sub>22</sub> | 1.62 | O <sub>34</sub> -Si <sub>32</sub> -O <sub>33</sub> | 130.0 |
| O <sub>25</sub> -Si <sub>23</sub> | 1.62 | -                                                  | -     |
| Si <sub>26</sub> -O <sub>25</sub> | 1.62 | -                                                  | -     |
| O <sub>27</sub> -Si <sub>22</sub> | 1.54 | -                                                  | -     |
| O <sub>28</sub> -Si <sub>26</sub> | 1.54 | -                                                  | -     |
| O <sub>29</sub> -Si <sub>23</sub> | 1.54 | -                                                  | -     |
| Si <sub>30</sub> -O <sub>20</sub> | 1.63 | -                                                  | -     |
| Si <sub>31</sub> -O <sub>21</sub> | 1.66 | -                                                  | -     |
| O <sub>32</sub> -Si <sub>30</sub> | 1.64 | -                                                  | -     |
| O <sub>33</sub> -Si <sub>30</sub> | 1.54 | -                                                  | -     |
| O <sub>34</sub> -Si <sub>31</sub> | 1.54 | -                                                  | -     |

In Figure S5 the map of the molecular electrostatic potential of the SiO<sub>2</sub> is displayed. The regions acting as electron receptor for H<sub>2</sub>O and an electron donor for molecular O<sub>2</sub> are highlighted. The analysis of the charge transfer from H<sub>2</sub>O to SiO<sub>2</sub> is 0.04 e<sup>-</sup>, on the other hand, the surface of SiO<sub>2</sub> is able to transfer 0.10 e<sup>-</sup> to O<sub>2</sub> molecule. After this charge transfer, new electrophilic/nucleophilic centers appear on the surface giving the quantum probability of new interactions.

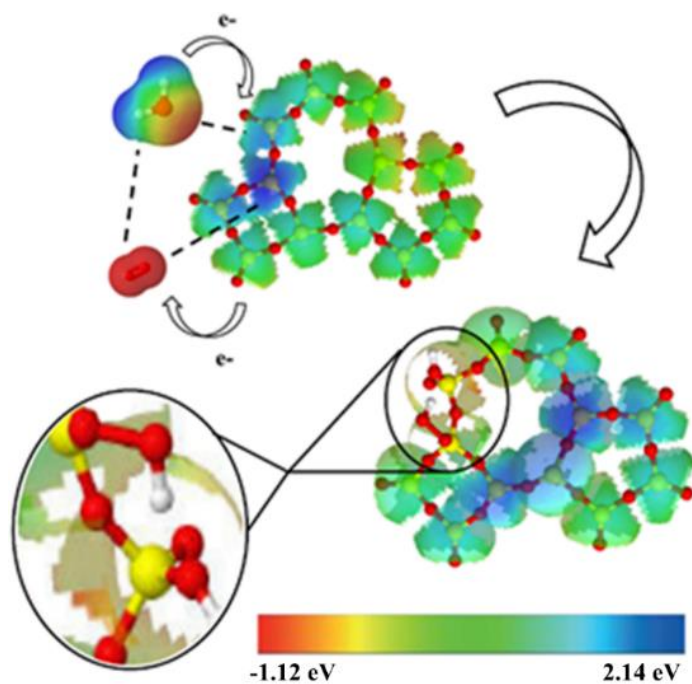

Figure S5 MEP (in eV) of SiO<sub>2</sub> model.

## References

1. Civalleri, B.; Garrone, E.; Ugliengo, P. Ab Initio Study of the Adducts of Small Molecules with the Isolated Hydroxyl of Silica and the Brønsted Site in Zeolites: A Comparison between B3-LYP and MP2 Methods. *J. Phys. Chem. B* **1998**, *102*, 2373–2382, doi:10.1021/jp972281b.
2. Bera, S.; Won, D.-I.; Rawal, S. B.; Kang, H. J.; Lee, W. I. Design of Visible-Light Photocatalysts by Coupling of Inorganic Semiconductors. *Catal. Today* **2019**, *335*, 3–19, doi:10.1016/j.cattod.2018.11.001.
